# The evolutionary making of SARS-CoV-2

Ruben Iruegas<sup>1</sup>, Julian Dosch<sup>1</sup>, Mateusz Sikora<sup>2,3</sup>, Gerhard Hummer<sup>2,4</sup>, Roberto Covino<sup>5</sup>,  
and Ingo Ebersberger<sup>1,6,7,\*</sup>

1 Applied Bioinformatics Group, Inst of Cell Biology and Neuroscience, Goethe University  
Frankfurt, Frankfurt am Main, Germany

2 Department of Theoretical Biophysics, Max Planck Institute of Biophysics, Frankfurt am  
Main, Germany

3 Faculty of Physics, University of Vienna, Vienna, Austria

4 Institute of Biophysics, Goethe University Frankfurt, Frankfurt am Main, Germany

5 Frankfurt Institute for Advanced Studies (FIAS), Frankfurt am Main, Germany

6 Senckenberg Biodiversity and Climate Research Centre (S-BIK-F), Frankfurt am Main,  
Germany

7 LOEWE Centre for Translational Biodiversity Genomics (TBG), Frankfurt am Main,  
Germany

\* Corresponding author: [ebersberger@bio.uni-frankfurt.de](mailto:ebersberger@bio.uni-frankfurt.de)

## Abstract

Covid-19 is the most devastating pandemic of the past 100 years. A zoonotic transfer presumably at a wildlife market introduced the causative virus, SARS-CoV-2 (sarbecovirus; beta-coronavirus), to humans in late 2019. Meanwhile, the mechanistic details of the infection process have been largely elucidated, and structural models explain binding of the virial spike to the human cell surface receptor ACE2. Yet, the evolutionary trajectory that gave rise to this pathogen is poorly understood. Here we scan SARS-CoV-2 protein sequences in-silico for innovations along the evolutionary lineage starting with the last common ancestor of coronaviruses. Substantial differences in the sets of proteins encoded by SARS-CoV-2 and viruses outside sarbecovirus, and in their domain architectures, indicate divergent functional demands. By contrast, sarbecoviruses themselves are almost fully conserved at these levels of resolution. However, profiling spike evolution on the sub-domain level using predicted linear epitopes reveals that this protein was gradually reshaped within sarbecovirus. The only epitope that is private to SARS-CoV-2 overlaps with the furin cleavage site. This lends phylogenetic support to the hypothesis that a change in strategy facilitated the zoonotic transfer of SARS-CoV-2 and its success as a human pathogen. Upon furin cleavage, spike switches from a “stealth mode” where immunodominant ACE2 binding epitopes are largely hidden to an “attack mode” where these epitopes are exposed. The resulting reinforcement of ACE2 binding extends the window of opportunity for cell entry. SARS-CoV-2 variants fine-tuning this mode switch will be particularly threatening as they optimize immune evasion.

## Introduction

Coronaviruses (CoV) are common human and animal pathogens (Narayanan, et al. 2015; Weiss and Navas-Martin 2005), which had historically been associated with only considerably mild symptoms. Following two global CoV outbreaks associated with severe acute respiratory syndromes (SARS) caused by SARS-CoV-1 (2002) and MERS-CoV (2012), respectively, CoVs are acknowledged as potent emerging human pathogens (Coleman and Frieman 2014). With SARS-CoV-2 as the causative agent of COVID19 (Zhou, et al. 2020b), the first coronavirus has entered the top ranks of human viral pathogens. In only 12 months, the WHO reported worldwide 85.5 million confirmed infections and 1.8 million deaths (<https://covid19.who.int>), and the socio-economic impact is unprecedented.

SARS-CoV-2 and SARS-CoV-1 belong to the subgenus sarbecovirus within the beta-coronaviruses (Coronaviridae Study Group of the International Committee on Taxonomy of 2020). Sarbecoviruses are prevalent in bats (Hu, et al. 2017; Li, et al. 2005), and it is general consensus that horseshoe bats act as natural reservoirs of these viruses (Cui, et al. 2019; Zhou, et al. 2020b). While SARS-CoV-1 presumably used civets as a jumping host (Guan, et al. 2003; Li, et al. 2005; Wu, et al. 2005), the closest known relatives to SARS-CoV-2 are two bat viruses. RaTG13 was isolated already in 2013 from the intermediate horseshoe bat, *Rhinolophus affinis* (Zhou, et al. 2020b), and only recently RmYN02 was identified via a metagenomics sequencing of viruses isolated from the Malayan horseshoe bat, *R. malayanus* (Zhou, et al. 2020a).

The SARS-CoV-2 genome comprises 10 non-overlapping open reading frames (ORFs; Figure 1A). Four ORFs encode the structural building blocks of the virus, the nucleocapsid

phosphoprotein (N), the membrane glycoprotein (M), the surface glycoprotein (spike), and the envelope protein (E). A fifth ORF holds the information for the polyproteins 1a and 1ab, which are post-translationally cleaved into 16 sub-units comprising the replication machinery of the virus (de Wit, et al. 2016; Narayanan, et al. 2015; Ziebuhr, et al. 2000). The precise functions of the proteins encoded by the remaining ORFs are only partly understood, and it is assumed that they play a role in fine-tuning host interaction (Issa, et al. 2020; Li, et al. 2020a; Liu, et al. 2014; Miorin, et al. 2020; Morante, et al. 2020). Of all proteins encoded in the SARS-CoV-2 genome, the spike has received most attention. The 1273 amino acid long, heavily glycosylated protein (Walls, et al. 2020; Walls, et al. 2016) mediates the primary interaction of the virus with its host (Walls, et al. 2020; Walls, et al. 2017) and thus is the main target of the human immune response (Shrock, et al. 2020). Like its ortholog in SARS-CoV-1 (Lan, et al. 2020; Li, et al. 2003) the spike interacts via its receptor binding domain (RBD), and the receptor binding motif (RBM) therein, with the angiotensin-converting enzyme 2 (ACE-2) receptor of the host cell (Lan, et al. 2020; Letko, et al. 2020; Walls, et al. 2020; Wrobel, et al. 2020). The spike is organized as a homotrimer (Turonova, et al. 2020; Wrapp, et al. 2020). In each chain, the RBD can either point down or up. Spike is in a 'closed' state when all RBDs are down, and it is 'open' when at least one RBD is up (Wrobel, et al. 2020). During the infection process, spike can be proteolytically cleaved into the receptor binding domain (S1) and the fusion domain (S2) (Hoffmann, et al. 2020b; Jaimes, et al. 2020; Shang, et al. 2020a) by furin, a human endoprotease active at multiple compartments within the trans-Golgi network and also on the cell surface (Molloy, et al. 1999). The resulting destabilization of the trimer shifts the balance of the receptor conformation towards an open state, which increases the binding affinity to human ACE2 by three orders of magnitude (Wrobel, et al. 2020). Proteolytic

cleavage by the TMPRSS2 protease activates the fusion of the viral envelope with host membranes (Hoffmann, et al. 2020a; Hoffmann, et al. 2020b; Shang, et al. 2020a; Walls, et al. 2017). Although the initial furin cleavage is not strictly required for the infection process (e.g. (Turonova, et al. 2020)), it enhances cell entry (Shang, et al. 2020a). Structural analyses of the spike and of its interaction with ACE2 have meanwhile revealed the position and identity of the residues in the receptor-binding domain that are responsible for the tight binding between the two proteins (Lan, et al. 2020; Liu, et al. 2020; Mehdipour and Hummer 2020; Shang, et al. 2020b; Wrobel, et al. 2020). Among all known animal sarbecoviruses, the RBM of the pangolin virus spike shows the highest similarity (98.6%) to RBM of SARS-CoV-2 (Liu, et al. 2020). Since pangolins are known reservoirs for beta-coronaviruses, it was suspected that a recombinant between a pangolin virus and a bat virus gave rise to SARS-CoV-2 (Lam, et al. 2020; Li, et al. 2020b; Liu, et al. 2020; Xiao, et al. 2020). However, more recently evidence accumulated that RaTG13 secondarily modified the RBM in its spike (Boni, et al. 2020). This does not preclude pangolins as the jumping host, but evidence in favor of a direct transmission from bats has accumulated (Boni, et al. 2020).

Since the first reported case of Covid-19 in late 2019, the understanding of how SARS-CoV-2 interacts with the human host, and how the virus evolves in the human lineage (Korber, et al. 2020) has substantially increased. Yet, the evolutionary trajectory that turned an animal virus into a potent human pathogen remains obscure. Here we present a high-resolution phylogenetic profiling analysis of the proteins encoded in the SARS-CoV-2 genome across representatives covering the diversity of the coronaviridae. Our results reveal that sarbecoviruses are distinct from other members of the beta-coronaviruses both with respect to the set of encoded proteins and of their domain architectures. On this level

of resolution, changes within the sarbecoviruses are scarce and provide no information about the emergence of SARS-CoV-2. This picture changes when we use predicted linear T-cell epitopes to scan the spike surface for genetic innovation. Here, we see a prominent signal pointing towards a gradual reshaping of spike during virus evolution, which sheds light on the evolutionary making of this pathogen.

## Methods

### Data collection

A collection of 279 virus genomes covering the currently known diversity of coronaviridae was downloaded from the RefSeq, GenBank, ViPR, and GISAID databases (Shu and McCauley 2017). The taxon sampling includes four subgenera of the beta-coronaviruses, i.e., sarbecovirus harboring SARS-CoV-2 and SARS-CoV-1, together with closely related strains isolated from pangolins, bats and civets, hibecovirus, nobecovirus, merbecovirus, and embecovirus. Representatives from the alpha-, gamma-, and delta-coronaviridae complement the taxon sampling. The list of taxa is provided in Table S1.

### Phylogenetic profiling and feature architecture comparison

Phylogenetic profiles of the 10 ORFs annotated in the genome of SARS-CoV-2 were generated with the targeted ortholog search tool fDOG ([www.github.com/BIONF/fDOG](http://www.github.com/BIONF/fDOG)) (Ebersberger, et al. 2014) using the strain ASM985889v3 (RefSeq Assembly accession GCF\_009858895.2) as the seed. Linear protein features were annotated in the following way: Pfam (Pfam v.33.1) (El-Gebali, et al. 2019) and SMART (Letunic, et al. 2009) domains were annotated with hmmsearch from the HMMER package (Finn, et al. 2015), low complexity regions were predicted with flps (Harrison 2017) and SEG (Wootton and Federhen 1993), signal peptides with SignalP (Petersen, et al. 2011), transmembrane

domains with tmhmm (Sonnhammer, et al. 1998), and coiled-coil conformations with COILS2 (Lupas, et al. 1991). The resulting feature architectures (FA) were compared pairwise between the seed proteins and each of their orthologs, and feature architecture similarity scores (FAS scores)(Koestler, et al. 2010) were computed with GreedyFAS v.1.4.8 (<https://github.com/BIONF/FAS>) integrated into the fDOG package. FAS score ranges between 0 ( $FA_{\text{seed}}$  and  $FA_{\text{ortholog}}$  are disjunct) and 1 ( $FA_{\text{seed}} = FA_{\text{ortholog}}$ ). Feature-aware phylogenetic profiles were visualized and analyzed with PhyloProfile v.1.4 (Tran, et al. 2018).

### **Phylogenetic tree reconstruction**

For maximum likelihood (ML) tree reconstruction, multiple sequence alignments of the orthologous groups for S, N, and ORF1ab were created with mafft-linsi (Kato and Toh 2008), respectively. ML trees for the individual alignments were computed with RAxML (Stamatakis 2014), allowing the software to automatically select the best fitting substitution model (Option PROTGAMMAAUTO). Branch support was assessed with 100 bootstrap replicates. The viral phylogeny was then computed from the individual gene trees with ASTRAL III (Zhang, et al. 2018).

### **Epitope prediction**

Spike proteins were scanned for the presence of linear T-cell epitopes using the consensus epitope prediction approach (Moutaftsi, et al. 2006; Wang, et al. 2008) provided via the Immune Epitope Database website (<http://www.iedb.org/>)(Vita, et al. 2019). Major histocompatibility complex (MHC) anchor residues in the antigen were predicted by using the models based on reference sets for class I (Greenbaum, et al. 2011) and II (Weiskopf, et al. 2013). The two sets were compiled such that the represented alleles cover > 97% (MHC-I) and >99% (MHC-II) of the general population provided by the Allele frequency net

database (Gonzalez-Galarza, et al. 2020). Linear epitopes were filtered using a percentile rank cutoff of 0.1 and considered homologous if the aligned region in the orthologous sequence predicts binding affinity to the same MHC allele. Epitopes were classified according to their node of innovation and visualized on a 3D model of the full length, glycosylated SARS-CoV-2 spike protein embedded in a membrane (Sikora, et al. 2020) (publicly available at [10.5281/zenodo.4442942](https://zenodo.org/record/4442942)), using the Visual Molecular Dynamics (VMD) software v.1.9 (Humphrey, et al. 1996).

### **Surface accessibility analysis**

Surface accessibility of the spike was reported in (Sikora, et al. 2020), and is based on an extensive atomistic molecular dynamics (MD) simulation of a viral envelope patch containing 4 spike proteins in realistic conditions. The analysis considers the spike's structural flexibility and the steric dynamic shielding by the glycans that cover the spike surface. Accessibility analyses were done once with spikes in the conformation with 2 RBDs down and one up, and once with all RBDs down. The analysis' raw data is publicly available on [10.5281/zenodo.4442942](https://zenodo.org/record/4442942).

## **Results**

We used an evolutionary approach to shed light on the trajectory that ultimately gave rise to SARS-CoV-2. The phylogenetic profiles of the SARS-CoV-2 proteins across coronaviridae (Figure 1) reveal a coronavirus core genome comprising only four ORFs (M, N, S, and the P1). We find orthologs to the envelope protein, an essential structural and functional constituent of the shell of all coronaviruses (Mukherjee, et al. 2020; Schoeman and Fielding 2019), only in the alpha- and beta-CoV. However, identifying distant orthologs for short proteins—the envelope protein has a length of only 75aa—is difficult (Jain, et al. 2018),



and even more so since a conserved domain that is characteristic for the envelope protein in alpha- and beta-CoV is missing in the envelope protein of gamma- and delta-CoV (Schoeman and Fielding 2019). Thus, a limited sensitivity of the ortholog search (Jain, et al. 2019) likely explains why we failed to establish orthology relationships between the envelope proteins across all coronaviridae. A multi-gene phylogeny (Figure 2) recovers the four genera alpha-, beta-, gamma- and delta-CoV as monophyletic clades, respectively, and midpoint rooting places the alpha- and beta-coronaviruses as sister clades. Within beta-CoV, embecoviruses branch off first, followed by the merbecoviruses, which harbors with MERS the so far most aggressive human pathogen within the beta-coronaviruses (Petersen, et al. 2020). Nobecovirus and hibecovirus represent the closest relatives of sarbecovirus. Sarbecoviruses themselves are represented by three distinct lineages. The bat coronavirus BM48-31 branched off prior to the diversification of the monophyletic clades harboring SARS and SARS-CoV-2, respectively. Within the latter clade, the bat virus RaTG13 is placed stably as the closest known relative to SARS-CoV-2, followed by RmYN02, and the paraphyletic pangolin viruses from Guangdong and Guangxi, respectively. Two further bat viruses represent the early branching lineages in this clade. Considering the distribution of viral hosts, the phylogeny reveals that only bat viruses cover the full phylogenetic diversity of sarbecoviruses (Figure 2).

Arranging the presence/absence pattern of orthologs to the SARS-CoV-2 proteins according to the reconstructed tree shows that sarbecoviruses are not only phylogenetically but also genetically distinct from other coronaviruses (cf. Fig. 1B). ORFs 6 - 10 are confined to this sub-genus. Only ORF3a, which was previously considered as unique to sarbecovirus (Issa, et al. 2020) has an ortholog at the correct position between the spike and the envelope protein also in the hibecovirus representative. The emergence of the

sarbecovirus sub-genus during beta-coronavirus diversification coincides with a complete exchange of the accessory gene set. Within sarbecovirus the gene set is stable. ORF10 encoding a 38 amino acid long polypeptide, whose orthologs are confined to SARS-CoV-2 seems a notable exception. Yet, a closer look revealed that almost identical sequences exist in representatives of all sarbecovirus lineages (100% coverage, 99% - 82% id; Figure S1), which are not annotated as an ORF. It was proposed that ORF10 might be a spurious gene prediction because no transcript could be detected in RNAseq data (Kim, et al. 2020). However, in the light of its maintenance and conservation throughout sarbecoviral evolution this assessment should be re-considered. In either case, the alleged gene gain of SARS-CoV-2 reduces to a difference in gene annotation.

### **Evolution of protein feature architecture**

The remarkably stable gene set reveals that neither the acquisition nor the loss of genes is a driving force of sarbecovirus evolution. We therefore increased the resolution to the level of linear features annotated along the individual proteins, such as Pfam domains, transmembrane regions, secondary structures or low complexity regions. The comparison of the resulting feature architectures (Koestler, et al. 2010) between orthologs revealed a more differentiated evolutionary pattern. Among the beta-CoV core proteins, we see lineage-specific variations in their architectures on the genus and sub-genus level for three proteins (E, N, and S). The differences are mainly due to the differential presence of regions enriched with a particular amino acid, and of secondary-structure elements (see Figure S2 for the spike). In particular, terminal low complexity regions are often involved in protein-protein interactions (Coletta, et al. 2010), and it will be interesting to see whether the differences detected here do have functional consequences. For the non-structural proteins (NSPs) contained in the polyprotein 1ab, we largely see a similar picture (Figures

S3, Table S2), where overall differences are mainly due to lineage-specific gains or losses of low complexity regions. This agrees with the notion that the enzymatic activity and functional domains of essential NSPs are conserved across CoV diversity (Snijder, et al. 2003; Thiel, et al. 2003). However, there are two notable exceptions, NSP1 and NSP3. NSP1 is involved in shutting down the translation of host mRNAs to free capacities for the production of viral proteins (Narayanan, et al. 2015; Tanaka, et al. 2012). The phylogenetic profiling yielded NSP1 orthologs only in beta-CoV but not in the other genera. This is in line with previous findings that alpha- and beta-CoV NSP1s share no significant sequence similarity (Connor and Roper 2007; Jansson 2013), and with the absence of NSP1 in gamma- and delta-CoV (Snijder, et al. 2003; Woo, et al. 2010). Within beta-CoV, no orthology relationships could be established to MERS NSP1. Despite the existence of individual conserved motifs (Figure S4), MERS NSP1 has diverged beyond recognition as an ortholog. This pronounced change in sequence goes hand in hand with a different mode of action. Other than NSP1 of SARS-CoV-1, MERS NSP1 does not form a stable complex with the 40S ribosomal subunit to block the translation of host mRNAs. Instead, it inhibits selectively the translation of mRNAs transcribed in the nucleus but not of viral mRNAs that are transcribed in the cytoplasm (Lokugamage, et al. 2015). NSP3, the second protein with a notable change in its feature architecture, is a large transmembrane protein. It forms the core of a pore complex that spans both membranes of the cytosolic vesicle where viral genome replication takes place (Wolff, et al. 2020). NSP3 is suspected to play a key role in the transfer of messenger RNAs from the replication compartments to the cytosol. A comparison of the feature architectures for this protein reveals two major changes during beta-CoV evolution (Figure S5). NSP3 of embecovirus, as well as of all alpha-, gamma-, and delta-CoVs in our analysis harbor two CoV\_peptidase domains representing papain-

like protease (PL<sup>Pro</sup>) domains that are used to release NSP3 from the polyprotein (Lei, et al. 2018). The N-terminal peptidase domain, PL<sup>Pro</sup>-1 was lost after the split of the embecovirus lineage. This finding is in line with previous reports (Lei, et al. 2018; Neuman 2016), but the functional implication of this domain loss is still unclear. The second major change is the gain of the Pfam domain bCoV\_SUD\_C (PF12124) in the last common ancestor of the sarbecoviruses. This domain is involved in the binding of single-stranded RNA (Johnson, et al. 2010). Its emergence in the sarbecoviruses provides an initial indication that the precise ways how mRNA export is mediated has been changed during beta-coronavirus evolution. Orthologs of the SARS-CoV-2 accessory proteins are, with one exception, absent outside sarbecovirus and their evolutionary origins remain elusive. The feature architecture comparisons of ORF3a, which is represented by an ortholog in hibecovirus, provides unprecedented insights into the evolutionary origins of this protein (Figure 3). ORF3a forms a homo-tetrameric ion channel (Issa, et al. 2020; Lu, et al. 2006), it is pro-apoptotic and localizes at the endoplasmic reticulum – Golgi compartment (Issa, et al. 2020; Minakshi, et al. 2009). The sarbecovirus orthologs consistently display 3 transmembrane domains in their N-terminal half, together with a bCoV\_viroporin Pfam domain (PF11289) spanning the full protein. The hibecovirus ortholog of ORF3a displays also three transmembrane domains. Instead of the bCoV\_viroporin domain, its central part displays a weak similarity to the CoV\_M Pfam domain (PF01635; e-value: 0.25). This domain is otherwise characteristic for the membrane protein M, which interacts with the spike and the envelope protein to form the virus envelope at the endoplasmic reticulum – Golgi intermediate compartment (ERGIC, (Ujike and Taguchi 2015)). Notably, the length of M is similar to that of ORF3a in sarbecovirus and hibecovirus, it shares with ORF3a of both subgenera the presence of three transmembrane domains in its N-terminal half, and with

hibecovirus ORF3a the presence of the CoV\_M Pfam domain. Eventually, both M and ORF3a act at the same sub-cellular localization, the ERGIC. Together, this lets us hypothesize that ORF3a emerged by a duplication of M in the last common ancestor of sarbecovirus and hibecovirus and subsequently diversified in sequence, domain architecture, and function.

Similar to the findings on the gene level, we observe for the entire gene set remarkably conserved feature architectures within the sarbecoviruses (cf. Figures 1B and S3). Of the three lineage-specific changes, two represent losses of low-complexity regions in the proteins encoded by ORFs 6 and 7A. The third event, however, is a loss of an N-terminal signal peptide in SARS-CoV-1 due to a 39 amino acid long deletion (Figure S6) that is otherwise prevalent in the sarbecoviruses. The protein encoded by ORF8 is involved in envelope protein regulation, cell death, viral replication, and suppression of the interferon response from the host (Wong, et al. 2018). ORF8 deletions in SARS-CoV-1 have been associated with attenuated replication, probably as a consequence of the virus' adaptation to the human host (Muth, et al. 2018). Meanwhile, lineage-specific deletions in ORF8 emerged also in SARS-CoV-2 (Gamage, et al. 2020; Rambaut, et al. 2020; Su, et al. 2020), which suggests that ORF8 might be a general way to fine-tune virus activity within the human host.

### **Evolution of the epitope landscape**

The comparison of feature architectures between SARS-CoV-2 proteins and their orthologs within and outside sarbecovirus revealed a number of differences, likely with functional consequences. However, there is still no indication that any of the underlying changes have contributed to the evolutionary emergence of SARS-CoV-2. Spike, while modified in the course of sarbecovirus evolution (Jaimes, et al. 2020; Lan, et al. 2020; Walls, et al. 2020;

Wrobel, et al. 2020; Zhou, et al. 2020a), displays a fully conserved domain architecture within sarbecovirus. We therefore scanned the spike for changes on the sub-domain level. Epitopes are short structural elements exposed on the protein surface that are visible to, and recognized by, antibodies and other proteins of the host. The epitope landscape of the spike should therefore reveal the interface via which the virus interacts with the host, not only in eliciting immune response (Ng, et al. 2020; Shrock, et al. 2020; Zhang, et al. 2020a) but also during the infection process.

The consensus epitope prediction approach (Moutaftsi, et al. 2006; Wang, et al. 2008) resulted in nine linear epitopes (LE) along the sequence of the SARS-CoV-2 spike (Figures 4A and S7). With the exception of LE3, all are located in the S1 domain of the spike, and LE9 identifies the furin cleavage site that separates S1 from S2. LE2,4-6 reside in the RBD, and LE6 overlaps with the RBM therein.

However, the spike protein is heavily glycosylated, and the glycans shield a considerable fraction of the protein from interactions with host molecules (Casalino, et al. 2020; Sikora, et al. 2020; Watanabe, et al. 2020; Wintjens, et al. 2020; Yang, et al. 2020). Since structural information was not considered in the prediction procedure, we integrated the position of the 9 epitopes with surface-accessibility information from a recent structural and physics-based modeling approach (Sikora, et al. 2020). This analysis suggests that LE3 is inaccessible in spike's pre-fusion conformation (Fig. S8), while LEs 1, 4 and 7 are surface exposed but partially covered by glycans (Table S3). Complementary evidence for the accessibility of the linear epitopes comes from various experimental studies. All LEs, except for LE4, overlap with experimentally confirmed epitopes resulting from a study exploring the humoral response in Covid-19 patient sera (Shrock, et al. 2020)(Figs. 4B and S7). LE3 is a cross-reactive epitope that is identified by antibodies against the spikes of

SARS-CoV-2 and of common cold viruses (HCoV) (Ng, et al. 2020). LE6 and LE8 overlap with the epitopes of two neutralizing human monoclonal antibodies against SARS-CoV-2, CB6 (Shi, et al. 2020) and 4A8 (Chi, et al. 2020), respectively, and LE7 is a “popular” epitope against which antibodies are detected in many Covid-19 patients (Shrock, et al. 2020). Taken together, there is sufficient evidence that the predicted LEs are exposed at least at some point during infection, and thus potentially participate in the interaction with the host.

Epitope scans in the spike orthologs revealed that the number of linear epitopes shared with the SARS-CoV-2 spike decreases with the evolutionary distance (Figures 4 and S7).

Secondary epitope losses are rare, with the exception of RmYN02, where a recombination event (Zhou, et al. 2020a) removed most of the ancestral epitopes. The LE analysis provides the first indication of a step-wise remodeling of the spike protein surface on the evolutionary lineage leading to SARS-CoV-2 (Figure 5). The four epitopes located in the RBD (LE2,4-6), which establishes the connection to ACE2, are of particular interest. Three of them (LE2,5,6) overlap with predicted B-cell epitopes that are at most partly shielded by glycans (Wintjens, et al. 2020). LEs 2 and 4, which correspond to the N- and C-termini of the RBD are present in almost all sarbecoviruses. LE5, which directly flanks LE2, is confined to the SARS-CoV-2 clade. LEs 4 and 5 are absent in the spikes of the GX pangolin viruses due to substitutions of otherwise fully conserved amino acid (Figure 4C). Together with the overall rarity of secondary epitope losses, it is tempting to speculate that these losses adapt the spike to the pangolin host. Notably, LE6 at the tip of the RBD (Figs. 5), which harbors four contacting residues to human ACE2 (Y449, Y453, L455, F456; (Lan, et al. 2020)) is present in RaTG13 and pangolin viruses. Thus, the virus was already preadapted to binding to human ACE2 long before its zoonotic transfer to humans.

Interestingly, LE6 is partly occluded when the RBD is down (Table S3; Fig. S9), which appears to be the preferential conformation of the spike in RatG13 and the pangolin viruses (Antoni, et al. 2021). It becomes fully exposed upon the conformational destabilization of the S trimer induced by the proteolytic cleavage (Wrobel, et al. 2020)(Fig. S9). Thus, LE9 – representing the furin cleavage site – allowed SARS-CoV-2 to carry into effect the binding capacity provided by an otherwise occluded RBM. This makes the acquisition of LE9 the key innovation underlying the zoonotic transfer of SARS-CoV-2, and its subsequent success in spreading through the human population.

## **Discussion**

In the past two decades, two human pandemics, SARS and COVID-19, emerged from zoonotic transfers of sarbecoviruses. This sub-genus of the beta-coronaviruses infects a broad range of mammalian species. However, they are preferentially found in horseshoe bats (Zhou, et al. 2020b), and thus far only viruses isolated from bats span the full known phylogenetic diversity of the sarbecoviruses (our study, (Boni, et al. 2020; Zhou, et al. 2020a; Zhou, et al. 2020b)). Bats tolerate the infection with viruses that are lethal in other mammals (Schountz 2014). They found means to counteract the immune-modulatory effects of viral proteins, which otherwise result in a pro-inflammatory cytokine response that is associated with immunopathology, the main reason for severe and fatal outcomes of Covid-19 (Irving, et al. 2021; Perlman and Netland 2009) (for a review see (Banerjee, et al. 2020)). Consequently, bats presumably provide the main evolutionary playground for many pathogenic viruses, and in particular for sarbecoviruses (see Supplementary Discussion). Here we have investigated the innovations on the protein level that distinguish SARS-CoV-2 from other coronaviruses to shed light on the evolutionary trajectory transforming an animal virus into a human pathogen.



## **Genetic innovation on the sub-domain level**

The phylogenetic profiling of the SARS-CoV-2 protein set revealed that the sub-genus sarbecovirus is genetically distinct from all other coronaviruses. Differences in the feature architecture in particular of NSP1 and NSP3, which are present also outside sarbecovirus indicate a functional divergence of these proteins during coronavirus evolution. Within the sarbecoviruses, however, neither changes in gene set composition nor of feature domain architecture drive evolutionary diversification directing the attention to more subtle changes. Whole genome alignments of sarbecoviruses have meanwhile provided detailed information about sequence conservation/divergence patterns on a per-base resolution along a genome, and within coding regions in particular for the spike (Boni, et al. 2020; Li, et al. 2020b; Liu, et al. 2020). Yet, a substantial proportion of the spike is inaccessible either because the residues are buried or because they are shielded by glycans (Casalino, et al. 2020; Sikora, et al. 2020; Turonova, et al. 2020), such that most mutations are not visible to the host. The functional relevance of sequence changes outside sites of known function is difficult to assess. Comparative studies on the protein structure level (e.g. Wrobel, et al. (2020)) integrated with molecular dynamics simulations (Sikora, et al. 2020) provide a more direct view on relevant changes and similarities. Yet, the computational demand of such approaches renders them inappropriate for comparative studies across many taxa. With the phylogenetic profiling of predicted linear epitopes we present an approach of intermediate resolution that can be used for rapidly scanning protein surfaces for lineage specific changes on a sub-domain level.

Molecular dynamics simulations considering the glycan shield (Sikora, et al. 2020) integrated with viral epitope profiling (Shrock, et al. 2020) indicate that except LE4 all predicted linear epitopes are visible to the host at some point during infection. LEs 1, 3, and

7 are B-cell immunodominant, although structural inspections suggest that they are in the case of LE3 fully, and of LEs 1 and 7 partly inaccessible (Table S3; Fig. S8). However, protein surface accessibility assessments are based on the spike in pre-fusion conformation (Sikora, et al. 2020). Some epitopes will be exposed by spike's reorganization to the post-fusion conformation. Short-lived intermediate structures along this reorganization have thus far eluded both experimental and simulation approaches (Cai, et al. 2020; Wrobel, et al. 2020). The phylogenetic profiling of linear epitopes presented here therefore complements structure-based approaches. It has the potential to uncover "blind spots" of the structure-based accessibility analyses due to partial knowledge of the full conformational landscape.

### **Evolution of the epitope landscape**

The epitope landscape of the SARS-CoV-2 spike protein is the product of a gradual remodeling during sarbecovirus evolution (Figs. 4, 5). A comparison of SARS-CoV-1 with SARS-CoV-2 reveals that both pathogens display largely distinct sets of epitopes on their spike surface (Figs. S7 and S10). This is in congruence with the observation that only few human antibodies against SARS-CoV-1 cross-react with SARS-CoV-2 (Pinto, et al. 2020), and that cross-reacting antibodies are largely confined to the S2 domain of the spike where only one of our LEs is located (Ng, et al. 2020). In essence, the substantial overhaul of epitope landscapes on the two viral lineages underlines that SARS-CoV-2 is not just an evolutionarily refined version of SARS-CoV-1, which is congruent with their distinct placement in the virus phylogeny.

Our approach has one natural limitation that is shared with experimental epitope profiling studies (Ng, et al. 2020; Shrock, et al. 2020). Structural epitopes that emerge from the spatial proximity of non-adjacent peptides in the amino-acid sequence in the folded protein are not considered. It is for this reason that we miss a shared epitope between SARS-CoV-1

and SARS-CoV-2 that is recognized by the same antibody (Pinto, et al. 2020). Although the restriction to linear epitopes comes at the cost of a reduced sensitivity, it renders our approach scalable and independent of the availability of accurate 3D-models of the proteins under study. It thus can be rapidly applied to any novel variant of SARS-CoV2, as well as on any newly emerging human pathogen.

### **Epitope function balances immunodominance**

The interaction of the virus with its host requires that the pathogen exposes parts of the spike epitopes—most prominently the RBD and the RBM therein—to establish contact with the ACE2 (Lan, et al. 2020; Walls, et al. 2020). The resulting epitopes should be highly immunogenic, and their evolutionary emergence and subsequent fate must be determined by a trade-off between their relevance for virus function, and the counter-selective pressure imposed by the host immune system. For LE9, representing the furin cleavage site, and LE6, which harbors four contact residues to ACE2, the balance between risk and payoff of the epitope is clearly in favor of the latter. Both are critical for the infection process (Hoffmann, et al. 2020b; Lan, et al. 2020; McCallum, et al. 2020; Shang, et al. 2020a). It is still unclear why the other epitopes are maintained. In particular, the presence of LEs 3 and 8 should be strongly counter-selected. Both are detected by neutralizing human antibodies (Chi, et al. 2020; Ng, et al. 2020). LE8 is present also in RaTG13 and in viruses from the Guangdong pangolins, which suggests that selection could have acted long enough to eradicate the epitope. LE3, which is located in the S2 domain of the spike, is even more compelling. This epitope is present in all sarbecovirus spikes except that of RmYN02, and it shows cross-reactivity to antibodies formed against human CoV (Ng, et al. 2020). We see two possible explanations for the presence of these epitopes in the SARS-CoV-2 spike: Selection in bats and possible intermediate hosts was more permissive,

for which indeed evidence exists (Banerjee, et al. 2020), and the evolutionary time under new and more rigorous selective regime in humans was too short to drive the loss of this epitope. Alternatively, LE8 and even more so the conserved LE3 may play essential roles in spike's function that requires its presence despite opening a flank to the host's immune system. It is tempting to speculate that the same is true for the other epitopes, in particular for LEs that are common to the spikes of all sarbecoviruses. Such evolutionarily stable epitopes could represent preferred targets for the design of therapeutic interventions against a broad spectrum of sarbecoviruses. In fact, targeting epitopes on the conserved stalk of influenza viruses is a promising strategy for a universal vaccine development (Nachbagauer, et al. 2021).

### **Key innovations in the emergence of SARS-CoV-2**

RaTG13 and the GD pangolin viruses share all but one linear epitope with SARS-CoV-2. Our finding integrates perfectly with the recent observation that the spike protein isolated from the GD pangolin virus binds human ACE2 with about 10-fold higher affinity than the pangolin ACE2 (Antoni, et al. 2021). Together, this suggests that the spike in the common ancestor of these viruses was largely pre-adapted to humans, and presumably only subtle adjustments were required to optimize for human infection. Thus, the more ground-breaking innovation that allowed this pre-adapted virus to cross the species barrier and to become a highly successful human pathogen was not, as one could naively expect, the emergence of novel binding sites to the human cell surface receptor. Instead, it was a better control of when to find spike's RBDs in an open state, thus exposing pre-existing binding sites.

The spike of the animal viruses appears to reside mainly in the closed conformation with all RBDs down (Antoni, et al. 2021; Zhang, et al. 2020b). This renders the RBM, which is

represented in our analysis by LE6, largely inaccessible (cf. Table S3). Comparative cryo-EM analyses revealed that the un-cleaved spike trimer of SARS-CoV-2 is substantially more stable than its counterpart in RaTG13 (Wrobel, et al. 2020). This re-enforces the blocking of the RBM (cf. Fig. S9) and reduces binding affinity of spike to ACE2. However, at the same time, it hides the contained epitopes from the host immune system (Shang, et al. 2020a). With the furin cleavage site (LE9), SARS-CoV-2 has acquired a trait that is long known to be connected to pathogen virulence (Molloy, et al. 1999). Within CoV, furin cleavage sites are sporadically occurring in CoV, e.g. in MERS (Gierer, et al. 2013; Millet and Whittaker 2014), and in the murine coronavirus (MHV) (de Haan, et al. 2004), both viruses with a high mortality. This trait allows the virus to turn the hiding of the RBM in which the visibility of the virus for the host immune system is reduced – a strategy also known as “conformational masking” (Shang, et al. 2020a) – into a facultative “stealth mode”. The few RBDs still pointing up (Wrobel, et al. 2020) serve as ‘scouts’. They scan the environment and establish the initial albeit weak interaction with the host cell, which however is sufficient for the surface-located furin (Hoffmann, et al. 2020b; Molloy, et al. 1999; Shang, et al. 2020a) to cleave the spike at the furin cleavage site. The resulting destabilization of the trimer allows more RBDs to point upwards, which reinforces the binding to ACE2 by several orders of magnitude (Wrobel, et al. 2020). This extends the window of opportunity for spike processing necessary cell entry. The resulting higher immunogenicity of the spike in the “attack mode” presumably becomes irrelevant, as the virus then rapidly enters the host cell and by that evades the immune system.

Interestingly, with the D614G variant (Isabel, et al. 2020) we seem to have witnessed even a fine-tuning of this process. D614G swept within months through the SARS-CoV-2 population worldwide, which is indicative of a higher infectivity of this virus variant

(Korber, et al. 2020). This substitution results in a constitutively more open conformation of the RBD (Turonova, et al. 2020), which increases the ACE2 binding capability of the un-cleaved S-protein (Yurkovetskiy, et al. 2020), but seems to still keep the balance between epitope exposure in the RBD and immunogenicity. On the contrary, it was recently shown that loss of the furin cleavage site attenuates SARS-CoV-2 pathogenicity (Johnson, et al. 2021). In the light of these findings, it is likely that any mutations further fine-tuning the conformational dynamics of the spike are particularly threatening and should be included into the monitoring and risk-assessment of novel SARS-CoV-2 variant. The recently detected variant B1.1.7, which is substantially more infective than other SARS-CoV-2 strains, may fall in this category. It harbors a mutation in LE9 covering the furin cleavage site (P681H) (Rambaut, et al. 2020), and it will be interesting to see if and to what extent this affects the conformational dynamics of the spike and adds to the infectivity of this strain.

## Conclusions

Phylogenetic profiling is a rapid and low-cost approach to embed a pathogen into its evolutionary background and to screen for genetic innovations that caused its emergence. Here we could show that the implicit scanning of protein surfaces, via the prediction of linear T-cell epitopes, provides the necessary resolution to capture how SARS-CoV-2 gradually evolved from its common ancestor shared with other sarbecoviruses. Our findings suggest that the epitope landscape of the S-protein, the primary interface of virus-host interaction, was largely molded in bats. A change in strategy was the key innovation that contributed to the success of SARS-CoV-2. The acquisition of the furin cleavage site in combination with a higher stability of the S-protein trimer allowed the virus to evolve a

‘stealth mode’ where epitopes in the RBM are largely hidden from the host immune system and are exposed only shortly before endocytosis. This allows the virus to maintain and gradually optimize an epitope landscape that was initially formed in an environment where the selective pressure imposed by the immune system was less pronounced. Strategies to monitor and prevent the emergence of SARS-CoV-3 should therefore concentrate on species fulfilling at least two requirements: Their ACE2 receptor should be similar to that of humans, and their immune system is permissive enough to let the virus explore the epitope landscape of its surface proteins. In this context, the phylogenetic profiling of predicted linear epitopes can be routinely applied even when no protein structures are available, and it will be interesting to see how the extension of the catalogue beyond T-cell epitopes affects the resolution.

## **Data Availability**

All data underlying the phylogenetic profiles are available for download from

<https://applbio.biologie.uni-frankfurt.de/download/SARS-CoV-2/>

## **Acknowledgements**

The authors would like to thank Ngoc Vinh Tran for support with the customization of PhyloProfile, Dr. Florian E. Blanc, Sören von Bülow, and Michael Gecht for sharing scripts and structural models, Bardya Djahanschiri, Dr. Stefanie Ebersberger, and Dr. Ahmad Reza Mehdipour for helpful discussion. M.S. acknowledges support by the Austrian Science Fund FWF (Schrödinger Fellowship, 515 J4332-B28). M. S. and G. H. acknowledge support by the Max Planck Society. R. C. acknowledges support by the Frankfurt Institute for Advanced Studies. This research was supported by the research funding program Landes-Offensive zur Entwicklung Wissenschaftlich-ökonomischer Exzellenz (LOEWE) of

the State of Hessen, Research Center for Translational Biodiversity Genomics (TBG) and  
the Centre for multi-scale modelling, analysis and simulation of biological processes  
(CMMS).



## Figures

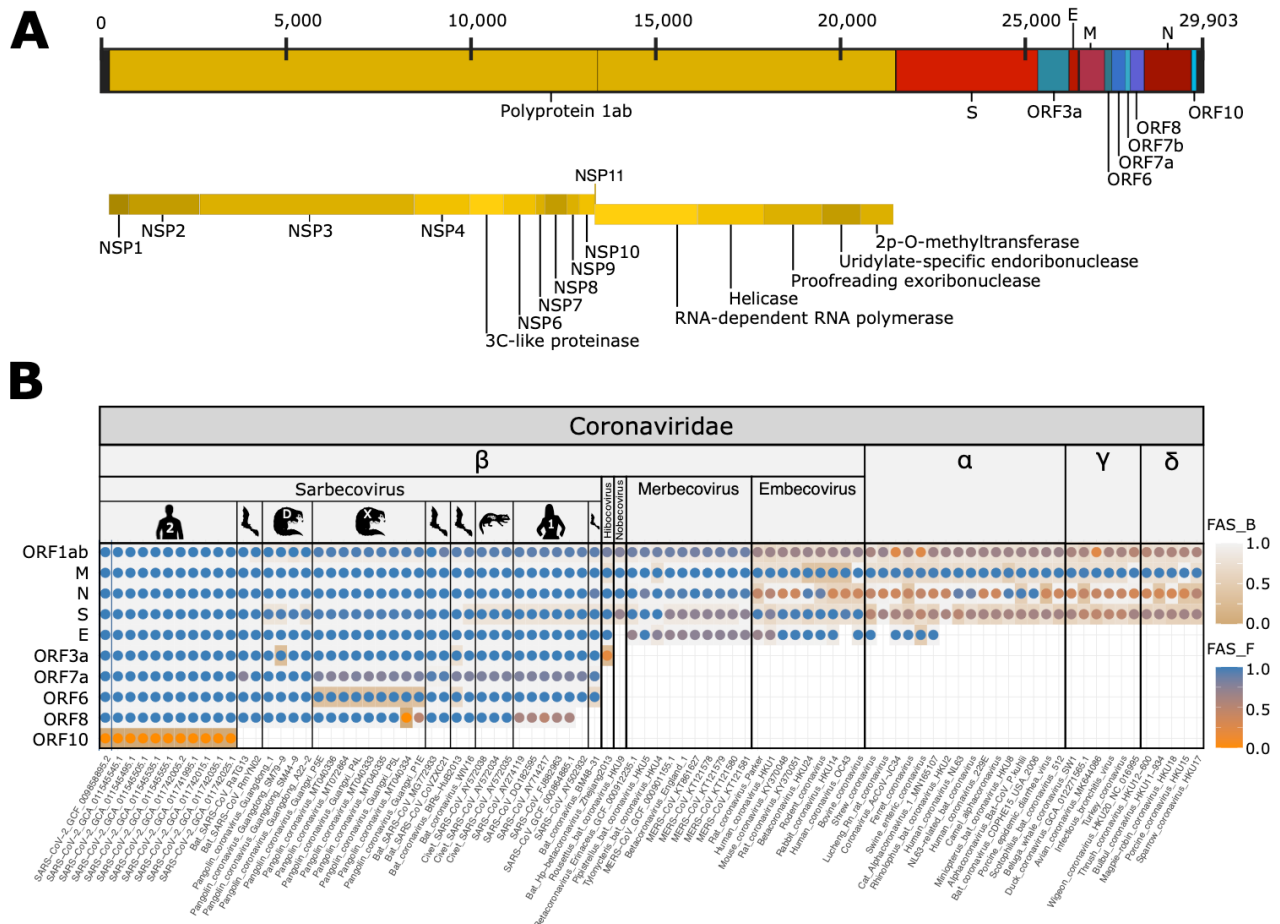

**Figure 1.** The evolutionary history of proteins encoded in the SARS-CoV-2 genome. A) Genomic composition of SARS-CoV-2. Represented are the polyprotein and its components (yellow), structural proteins (red), and accessory proteins (blue). B) Feature-aware phylogenetic profiles of SARS-CoV-2 proteins across the Coronaviridae. Sarbecoviral hosts are indicated by the pictograms. Human 1 and 2 represent SARS-CoV-1 and SARS-CoV-2, respectively. The Guangdong and Guangxi pangolin viruses are marked with ‘D’ and ‘X’, respectively. Taxa are ordered with increasing evolutionary distance to SARS-CoV-2 GCF\_009858895.2. Dots indicate the detection of an ortholog in the

respective species and represent the feature architecture similarity between the seed protein and its ortholog using once the seed (dot color; FAS\_F), and once the ortholog (cell color; FAS\_B) as reference. While feature architectures are largely conserved within sarbecoviruses, we see pronounced differences indicated by low FAS scores in merbecoviruses, embecoviruses, and outside the beta-CoV. Abbreviations: M – membrane glycoprotein, N – nucleocapsid protein, S – spike glycoprotein, E – envelope protein

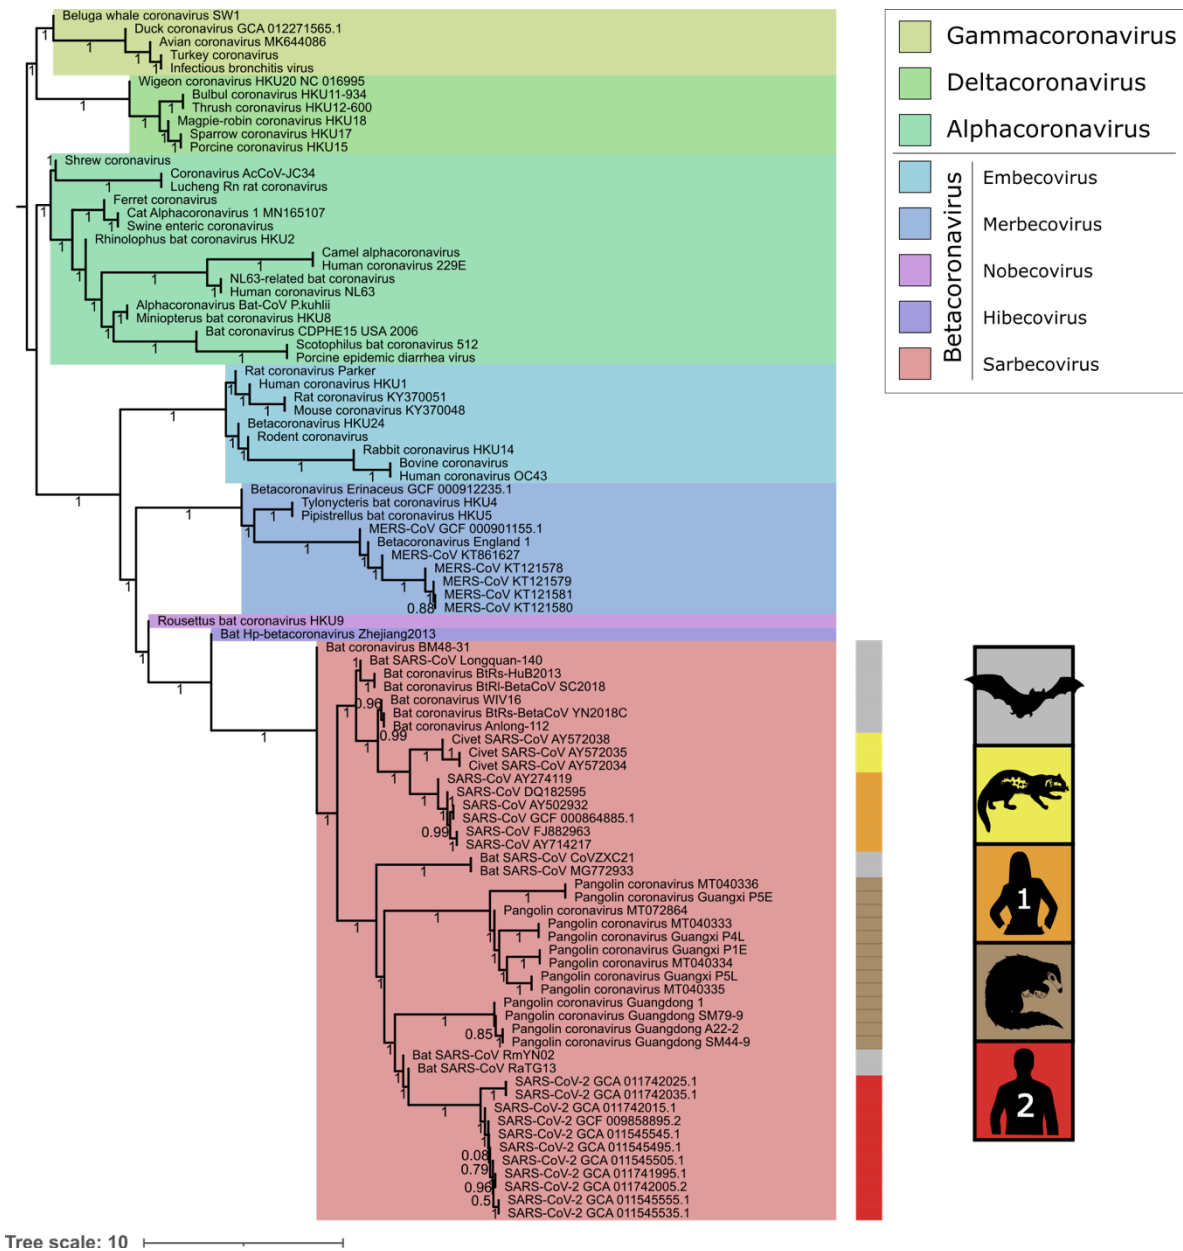

**Figure 2.** Maximum likelihood phylogeny of the coronaviridae. The tree resolves the genera and sub-genera as monophyletic clades and supports hibecovirus and nobecovirus as the closest relatives of the sarbecoviruses, the sub-genus comprising both SARS-CoV-1 and SARS-CoV-2. The beta-coronaviruses are resolved to their respective sub-genera. Clade-specific hosts within sarbecovirus are indicated by pictograms, where the human viruses 1 (orange) and 2 (red) represent SARS-CoV-1 and -CoV-2, respectively.

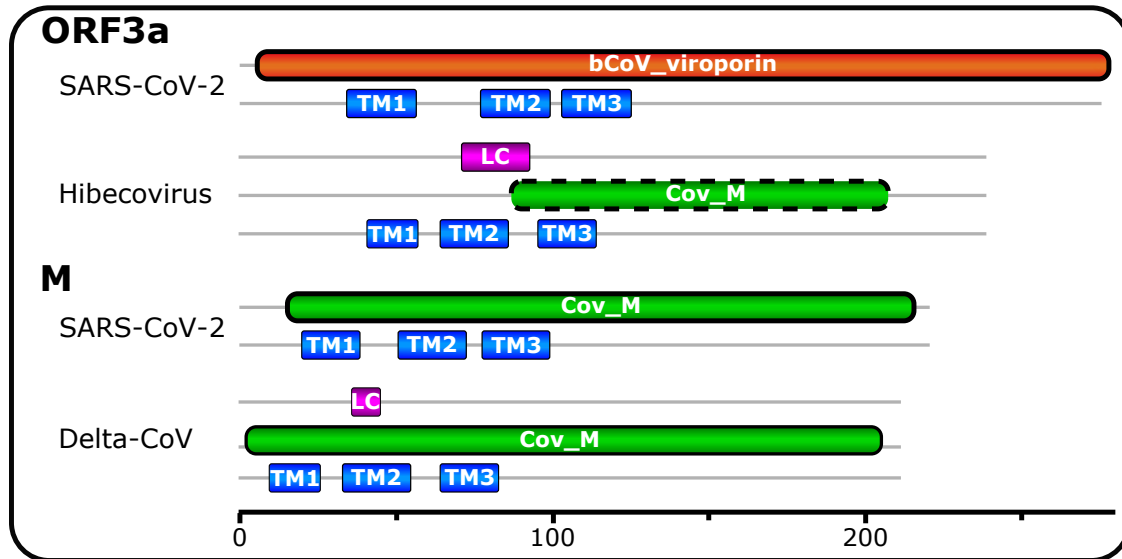

**Figure 3.** Feature architectures of SARS-CoV-2 ORF3a and M, and of their evolutionarily most distantly related CoV orthologs. Grey lines represent the amino acid sequences of the respective proteins, and colored bars indicate position and length of the protein parts occupied by the corresponding features. bCoV\_viroporin and CoV\_M represent the Pfam domains PF01635 and PF11289, respectively. The CoV\_M domain in hibecovirus ORF3a (hatched box) was identified with an e-value of 0.24. TM1-3 represent three transmembrane helices, and LC the position of regions with a biased amino acid composition. ORF3a SARS-CoV-2: YP\_009724391.1; ORF3A Hibecovirus: YP\_009072441.1; M SARS-CoV-2: YP\_009724393.1; M Delta-CoV: YP\_005352848.1

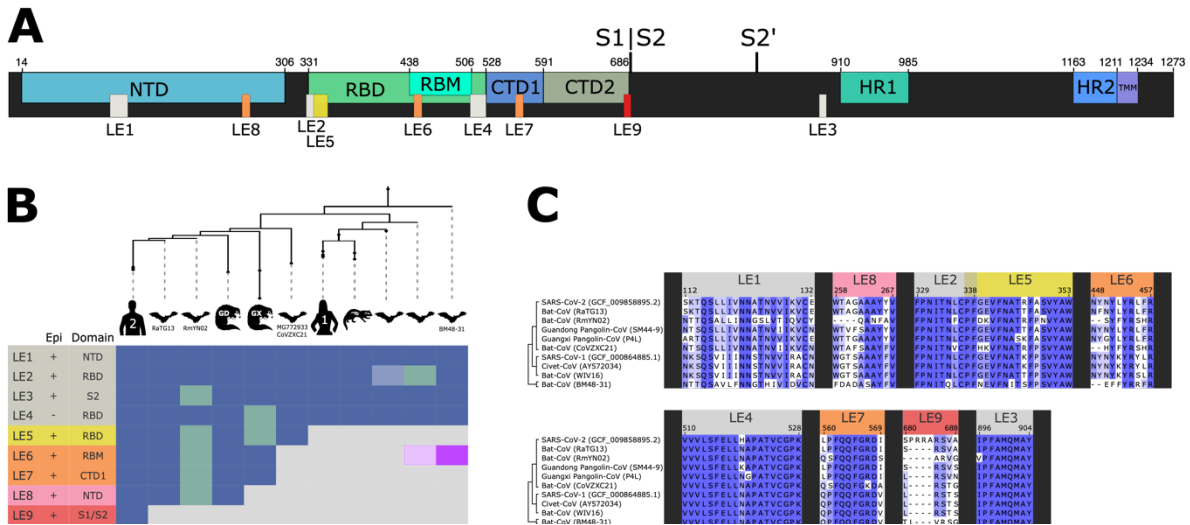

**Figure 4.** Representation of linear epitopes in the spike glycoprotein of SARS-CoV-2.

Domains were assigned according to the annotations from Cai, et al. (2020). A) Position of domains and linear epitopes in the spike. Represented are the N-terminal domain (NTD), receptor binding domain (RBD), receptor binding motif (RBM), C-terminal domain (CTD), furin cleavage site (S1|S2), second proteolytic cleavage site (S2'), heptad repeats (HR), and transmembrane region (TMM). B) Phylogenetic profile of predicted epitopes; epitope losses are indicated by a green cell color. The occurrence of LE6 in the early branching sarbecovirus lineage (purple cell color) is due to a convergent emergence of this epitope (cf. C). Epi: Overlap with experimentally verified epitopes (Shrock, et al. 2020). Domains were assigned according to Cai, et al. (2020). C) Multiple sequence alignment for the nine predicted linear epitopes across representatives of the sarbecoviruses.

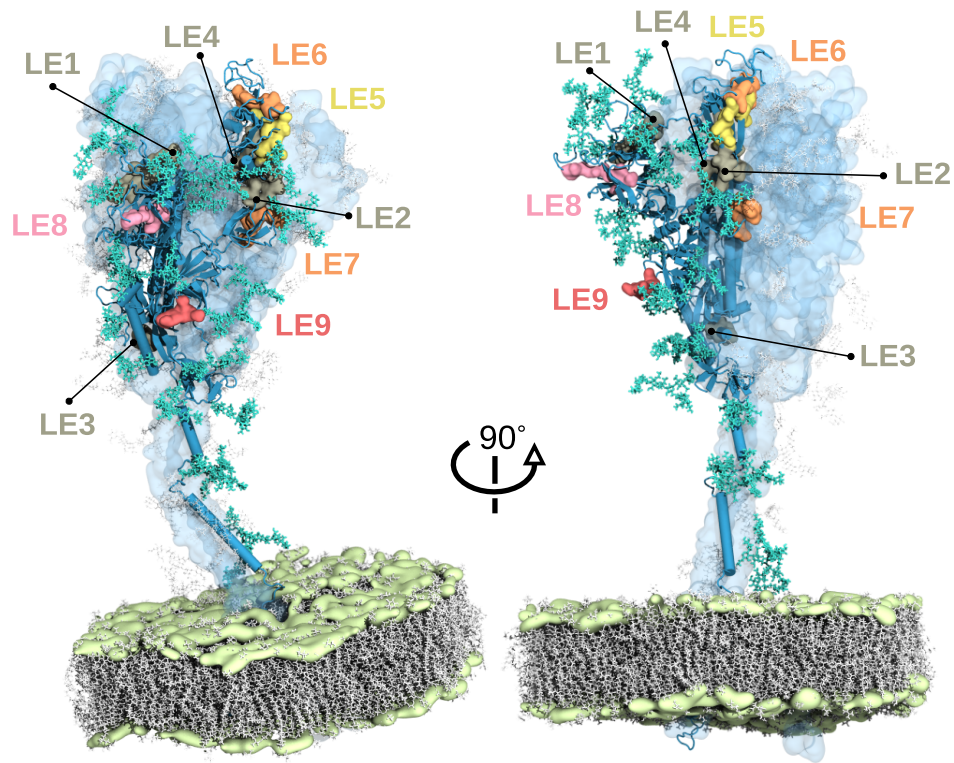

**Figure 5.** Predicted linear epitopes annotated on a full-length model of a spike glycoprotein of SARS-CoV-2. The structural model (Sikora, et al. 2020) represents the trimeric spike in a prefusion state embedded in a lipid bilayer (lipid tails marked gray and phosphate headgroups green). The epitopes in the surface representation (color coded according to the node of innovation, as stated in figure 3B) are overlaid with the chain in the "up" conformation (blue cartoon). Realistic glycan coverage is shown as turquoise licorice. The remaining two chains in the "down" conformation are shown as light-blue transparent surfaces, with corresponding glycans transparent gray. The epitope color resembles that of Fig. 4



## References

- Antoni GW, et al. 2021. Structure and binding properties of Pangolin-CoV Spike 2 glycoprotein inform the evolution of SARS-CoV-2. *Research Square*. doi: 10.21203/rs.3.rs-83072/v1
- Banerjee A, et al. 2020. Novel Insights Into Immune Systems of Bats. *Front Immunol* 11: 26. doi: 10.3389/fimmu.2020.00026
- Boni MF, et al. 2020. Evolutionary origins of the SARS-CoV-2 sarbecovirus lineage responsible for the COVID-19 pandemic. *Nat Microbiol*. doi: 10.1038/s41564-020-0771-4
- Cai Y, et al. 2020. Distinct conformational states of SARS-CoV-2 spike protein. *Science* 369: 1586-1592. doi: 10.1126/science.abd4251
- Casalino L, et al. 2020. Beyond Shielding: The Roles of Glycans in the SARS-CoV-2 Spike Protein. *ACS Cent Sci* 6: 1722-1734. doi: 10.1021/acscentsci.0c01056
- Chi X, et al. 2020. A neutralizing human antibody binds to the N-terminal domain of the Spike protein of SARS-CoV-2. *Science* 369: 650-655. doi: 10.1126/science.abc6952
- Coleman CM, Frieman MB 2014. Coronaviruses: important emerging human pathogens. *J Virol* 88: 5209-5212. doi: 10.1128/JVI.03488-13
- Coletta A, et al. 2010. Low-complexity regions within protein sequences have position-dependent roles. *BMC Syst Biol* 4: 43. doi: 10.1186/1752-0509-4-43
- Connor RF, Roper RL 2007. Unique SARS-CoV protein nsp1: bioinformatics, biochemistry and potential effects on virulence. *Trends Microbiol* 15: 51-53. doi: 10.1016/j.tim.2006.12.005
- Coronaviridae Study Group of the International Committee on Taxonomy of V 2020. The species Severe acute respiratory syndrome-related coronavirus: classifying 2019-nCoV and naming it SARS-CoV-2. *Nat Microbiol* 5: 536-544. doi: 10.1038/s41564-020-0695-z
- Cui J, Li F, Shi ZL 2019. Origin and evolution of pathogenic coronaviruses. *Nature Reviews Microbiology* 17: 181-192. doi: 10.1038/s41579-018-0118-9
- de Haan CA, Stadler K, Godeke GJ, Bosch BJ, Rottier PJ 2004. Cleavage inhibition of the murine coronavirus spike protein by a furin-like enzyme affects cell-cell but not virus-cell fusion. *J Virol* 78: 6048-6054. doi: 10.1128/JVI.78.11.6048-6054.2004
- de Wit E, van Doremalen N, Falzarano D, Munster VJ 2016. SARS and MERS: recent insights into emerging coronaviruses. *Nature Reviews Microbiology* 14: 523-534. doi: 10.1038/nrmicro.2016.81
- Ebersberger I, et al. 2014. The evolution of the ribosome biogenesis pathway from a yeast perspective. *Nucleic Acids Res* 42: 1509-1523. doi: 10.1093/nar/gkt1137
- El-Gebali S, et al. 2019. The Pfam protein families database in 2019. *Nucleic Acids Res* 47: D427-D432. doi: 10.1093/nar/gky995
- Finn RD, et al. 2015. HMMER web server: 2015 update. *Nucleic Acids Res* 43: W30-38. doi: 10.1093/nar/gkv397
- Gamage AM, et al. 2020. Infection of human Nasal Epithelial Cells with SARS-CoV-2 and a 382-nt deletion isolate lacking ORF8 reveals similar viral kinetics and host transcriptional profiles. *PLoS Pathog* 16: e1009130. doi: 10.1371/journal.ppat.1009130



- Gierer S, et al. 2013. The spike protein of the emerging betacoronavirus EMC uses a novel coronavirus receptor for entry, can be activated by TMPRSS2, and is targeted by neutralizing antibodies. *J Virol* 87: 5502-5511. doi: 10.1128/JVI.00128-13
- Gonzalez-Galarza FF, et al. 2020. Allele frequency net database (AFND) 2020 update: gold-standard data classification, open access genotype data and new query tools. *Nucleic Acids Res* 48: D783-D788. doi: 10.1093/nar/gkz1029
- Greenbaum J, et al. 2011. Functional classification of class II human leukocyte antigen (HLA) molecules reveals seven different supertypes and a surprising degree of repertoire sharing across supertypes. *Immunogenetics* 63: 325-335. doi: 10.1007/s00251-011-0513-0
- Guan Y, et al. 2003. Isolation and characterization of viruses related to the SARS coronavirus from animals in southern China. *Science* 302: 276-278. doi: 10.1126/science.1087139
- Harrison PM 2017. fLPS: Fast discovery of compositional biases for the protein universe. *BMC Bioinformatics* 18: 476. doi: 10.1186/s12859-017-1906-3
- Hoffmann M, Kleine-Weber H, Pohlmann S 2020a. A Multibasic Cleavage Site in the Spike Protein of SARS-CoV-2 Is Essential for Infection of Human Lung Cells. *Mol Cell* 78: 779-784 e775. doi: 10.1016/j.molcel.2020.04.022
- Hoffmann M, et al. 2020b. SARS-CoV-2 Cell Entry Depends on ACE2 and TMPRSS2 and Is Blocked by a Clinically Proven Protease Inhibitor. *Cell* 181: 271-280 e278. doi: 10.1016/j.cell.2020.02.052
- Hu B, et al. 2017. Discovery of a rich gene pool of bat SARS-related coronaviruses provides new insights into the origin of SARS coronavirus. *PLoS Pathog* 13: e1006698. doi: 10.1371/journal.ppat.1006698
- Irving AT, Ahn M, Goh G, Anderson DE, Wang LF 2021. Lessons from the host defences of bats, a unique viral reservoir. *Nature* 589: 363-370. doi: 10.1038/s41586-020-03128-0
- Isabel S, et al. 2020. Evolutionary and structural analyses of SARS-CoV-2 D614G spike protein mutation now documented worldwide. *Sci Rep* 10: 14031. doi: 10.1038/s41598-020-70827-z
- Issa E, Merhi G, Panossian B, Salloum T, Tokajian S 2020. SARS-CoV-2 and ORF3a: Nonsynonymous Mutations, Functional Domains, and Viral Pathogenesis. *mSystems* 5. doi: 10.1128/mSystems.00266-20
- Jaimes JA, Andre NM, Chappie JS, Millet JK, Whittaker GR 2020. Phylogenetic Analysis and Structural Modeling of SARS-CoV-2 Spike Protein Reveals an Evolutionary Distinct and Proteolytically Sensitive Activation Loop. *J Mol Biol* 432: 3309-3325. doi: 10.1016/j.jmb.2020.04.009
- Jain A, Perisa D, Fliedner F, von Haeseler A, Ebersberger I 2019. The Evolutionary Traceability of a Protein. *Genome Biol Evol* 11: 531-545. doi: 10.1093/gbe/evz008
- Jain A, von Haeseler A, Ebersberger I 2018. The evolutionary traceability of proteins. *bioRxiv*. doi: 10.1101/302109
- Jansson AM 2013. Structure of alphacoronavirus transmissible gastroenteritis virus nsp1 has implications for coronavirus nsp1 function and evolution. *J Virol* 87: 2949-2955. doi: 10.1128/JVI.03163-12
- Johnson BA, et al. 2021. Loss of furin cleavage site attenuates SARS-CoV-2 pathogenesis. *Nature*. doi: 10.1038/s41586-021-03237-4

- Johnson MA, Chatterjee A, Neuman BW, Wuthrich K 2010. SARS coronavirus unique domain: three-domain molecular architecture in solution and RNA binding. *J Mol Biol* 400: 724-742. doi: 10.1016/j.jmb.2010.05.027
- Katoh K, Toh H 2008. Recent Developments in the MAFFT Multiple Sequence Alignment Program. *Brief Bioinform* 9: 286-298.
- Kim D, et al. 2020. The Architecture of SARS-CoV-2 Transcriptome. *Cell* 181: 914-921 e910. doi: 10.1016/j.cell.2020.04.011
- Koestler T, Haeseler Av, Ebersberger I 2010. FACT: Functional annotation transfer between proteins with similar feature architectures. *BMC Bioinformatics* 11: 417.
- Korber B, et al. 2020. Tracking Changes in SARS-CoV-2 Spike: Evidence that D614G Increases Infectivity of the COVID-19 Virus. *Cell* 182: 812-827 e819. doi: 10.1016/j.cell.2020.06.043
- Lam TT, et al. 2020. Identifying SARS-CoV-2-related coronaviruses in Malayan pangolins. *Nature* 583: 282-285. doi: 10.1038/s41586-020-2169-0
- Lan J, et al. 2020. Structure of the SARS-CoV-2 spike receptor-binding domain bound to the ACE2 receptor. *Nature* 581: 215-220. doi: 10.1038/s41586-020-2180-5
- Lei J, Kusov Y, Hilgenfeld R 2018. Nsp3 of coronaviruses: Structures and functions of a large multi-domain protein. *Antiviral Res* 149: 58-74. doi: 10.1016/j.antiviral.2017.11.001
- Letko M, Marzi A, Munster V 2020. Functional assessment of cell entry and receptor usage for SARS-CoV-2 and other lineage B betacoronaviruses. *Nat Microbiol* 5: 562-569. doi: 10.1038/s41564-020-0688-y
- Letunic I, Doerks T, Bork P 2009. SMART 6: recent updates and new developments. *Nucleic Acids Res* 37: D229-232.
- Li JY, et al. 2020a. The ORF6, ORF8 and nucleocapsid proteins of SARS-CoV-2 inhibit type I interferon signaling pathway. *Virus Res* 286: 198074. doi: 10.1016/j.virusres.2020.198074
- Li W, et al. 2003. Angiotensin-converting enzyme 2 is a functional receptor for the SARS coronavirus. *Nature* 426: 450-454. doi: 10.1038/nature02145
- Li W, et al. 2005. Bats are natural reservoirs of SARS-like coronaviruses. *Science* 310: 676-679. doi: 10.1126/science.1118391
- Li X, et al. 2020b. Emergence of SARS-CoV-2 through recombination and strong purifying selection. *Sci Adv* 6. doi: 10.1126/sciadv.abb9153
- Liu DX, Fung TS, Chong KK, Shukla A, Hilgenfeld R 2014. Accessory proteins of SARS-CoV and other coronaviruses. *Antiviral Res* 109: 97-109. doi: 10.1016/j.antiviral.2014.06.013
- Liu P, et al. 2020. Are pangolins the intermediate host of the 2019 novel coronavirus (SARS-CoV-2)? *PLoS Pathog* 16: e1008421. doi: 10.1371/journal.ppat.1008421
- Lokugamage KG, et al. 2015. Middle East Respiratory Syndrome Coronavirus nsp1 Inhibits Host Gene Expression by Selectively Targeting mRNAs Transcribed in the Nucleus while Sparing mRNAs of Cytoplasmic Origin. *J Virol* 89: 10970-10981. doi: 10.1128/JVI.01352-15
- Lu W, et al. 2006. Severe acute respiratory syndrome-associated coronavirus 3a protein forms an ion channel and modulates virus release. *Proc Natl Acad Sci U S A* 103: 12540-12545. doi: 10.1073/pnas.0605402103
- Lupas A, Van Dyke M, Stock J 1991. Predicting coiled coils from protein sequences. *Science* 252: 1162-1164. doi: 10.1126/science.252.5009.1162

- McCallum M, Walls AC, Bowen JE, Corti D, Veessler D 2020. Structure-guided covalent stabilization of coronavirus spike glycoprotein trimers in the closed conformation. *Nat Struct Mol Biol* 27: 942-949. doi: 10.1038/s41594-020-0483-8
- Mehdipour AR, Hummer G 2020. Dual nature of human ACE2 glycosylation in binding to SARS-CoV-2 spike. *bioRxiv*: 2020.2007.2009.193680. doi: 10.1101/2020.07.09.193680
- Millet JK, Whittaker GR 2014. Host cell entry of Middle East respiratory syndrome coronavirus after two-step, furin-mediated activation of the spike protein. *Proc Natl Acad Sci U S A* 111: 15214-15219. doi: 10.1073/pnas.1407087111
- Minakshi R, et al. 2009. The SARS Coronavirus 3a protein causes endoplasmic reticulum stress and induces ligand-independent downregulation of the type 1 interferon receptor. *PLoS ONE* 4: e8342. doi: 10.1371/journal.pone.0008342
- Miorin L, et al. 2020. SARS-CoV-2 Orf6 hijacks Nup98 to block STAT nuclear import and antagonize interferon signaling. *Proc Natl Acad Sci U S A* 117: 28344-28354. doi: 10.1073/pnas.2016650117
- Molloy SS, Anderson ED, Jean F, Thomas G 1999. Bi-cycling the furin pathway: from TGN localization to pathogen activation and embryogenesis. *Trends Cell Biol* 9: 28-35. doi: 10.1016/s0962-8924(98)01382-8
- Morante S, La Penna G, Rossi G, Stellato F 2020. SARS-CoV-2 Virion Stabilization by Zn Binding. *Front Mol Biosci* 7: 222. doi: 10.3389/fmolb.2020.00222
- Moutaftsi M, et al. 2006. A consensus epitope prediction approach identifies the breadth of murine T(CD8+)-cell responses to vaccinia virus. *Nat Biotechnol* 24: 817-819. doi: 10.1038/nbt1215
- Mukherjee S, Bhattacharyya D, Bhunia A 2020. Host-membrane interacting interface of the SARS coronavirus envelope protein: Immense functional potential of C-terminal domain. *Biophys Chem* 266: 106452. doi: 10.1016/j.bpc.2020.106452
- Muth D, et al. 2018. Attenuation of replication by a 29 nucleotide deletion in SARS-coronavirus acquired during the early stages of human-to-human transmission. *Sci Rep* 8: 15177. doi: 10.1038/s41598-018-33487-8
- Nachbagauer R, et al. 2021. A chimeric hemagglutinin-based universal influenza virus vaccine approach induces broad and long-lasting immunity in a randomized, placebo-controlled phase I trial. *Nat Med* 27: 106-114. doi: 10.1038/s41591-020-1118-7
- Narayanan K, Ramirez SI, Lokugamage KG, Makino S 2015. Coronavirus nonstructural protein 1: Common and distinct functions in the regulation of host and viral gene expression. *Virus Res* 202: 89-100. doi: 10.1016/j.virusres.2014.11.019
- Neuman BW 2016. Bioinformatics and functional analyses of coronavirus nonstructural proteins involved in the formation of replicative organelles. *Antiviral Res* 135: 97-107. doi: 10.1016/j.antiviral.2016.10.005
- Ng KW, et al. 2020. Preexisting and de novo humoral immunity to SARS-CoV-2 in humans. *Science* 370: 1339-1343. doi: 10.1126/science.abe1107
- Perlman S, Netland J 2009. Coronaviruses post-SARS: update on replication and pathogenesis. *Nature Reviews Microbiology* 7: 439-450. doi: 10.1038/nrmicro2147
- Petersen E, et al. 2020. Comparing SARS-CoV-2 with SARS-CoV and influenza pandemics. *Lancet Infect Dis* 20: e238-e244. doi: 10.1016/S1473-3099(20)30484-9

- Petersen TN, Brunak S, von Heijne G, Nielsen H 2011. SignalP 4.0: discriminating signal peptides from transmembrane regions. *Nat Methods* 8: 785-786. doi: 10.1038/nmeth.1701
- Pinto D, et al. 2020. Cross-neutralization of SARS-CoV-2 by a human monoclonal SARS-CoV antibody. *Nature* 583: 290-295. doi: 10.1038/s41586-020-2349-y
- Preliminary genomic characterisation of an emergent SARS-CoV-2 lineage in the UK defined by a novel set of spike mutations [Internet]. 2020 [cited 2020 2020/12/20]. Available from: <https://virological.org/t/preliminary-genomic-characterisation-of-an-emergent-sars-cov-2-lineage-in-the-uk-defined-by-a-novel-set-of-spike-mutations/563>
- Schoeman D, Fielding BC 2019. Coronavirus envelope protein: current knowledge. *Virology* 16: 69. doi: 10.1186/s12985-019-1182-0
- Schountz T 2014. Immunology of bats and their viruses: challenges and opportunities. *Viruses* 6: 4880-4901. doi: 10.3390/v6124880
- Shang J, et al. 2020a. Cell entry mechanisms of SARS-CoV-2. *Proc Natl Acad Sci U S A* 117: 11727-11734. doi: 10.1073/pnas.2003138117
- Shang J, et al. 2020b. Structural basis of receptor recognition by SARS-CoV-2. *Nature* 581: 221-224. doi: 10.1038/s41586-020-2179-y
- Shi R, et al. 2020. A human neutralizing antibody targets the receptor-binding site of SARS-CoV-2. *Nature* 584: 120-124. doi: 10.1038/s41586-020-2381-y
- Shrock E, et al. 2020. Viral epitope profiling of COVID-19 patients reveals cross-reactivity and correlates of severity. *Science* 370. doi: 10.1126/science.abd4250
- Sikora M, et al. 2020. Map of SARS-CoV-2 spike epitopes not shielded by glycans. *bioRxiv*. doi: <https://doi.org/10.1101/2020.07.03.186825>
- Snijder EJ, et al. 2003. Unique and Conserved Features of Genome and Proteome of SARS-coronavirus, an Early Split-off From the Coronavirus Group 2 Lineage. *Journal of Molecular Biology* 331: 991-1004. doi: [https://doi.org/10.1016/S0022-2836\(03\)00865-9](https://doi.org/10.1016/S0022-2836(03)00865-9)
- Sonnhammer EL, von Heijne G, Krogh A 1998. A hidden Markov model for predicting transmembrane helices in protein sequences. *Proceedings / ... International Conference on Intelligent Systems for Molecular Biology ; ISMB. International Conference on Intelligent Systems for Molecular Biology* 6: 175-182.
- Stamatakis A 2014. RAxML version 8: a tool for phylogenetic analysis and post-analysis of large phylogenies. *Bioinformatics* 30: 1312-1313. doi: 10.1093/bioinformatics/btu033
- Su YCF, et al. 2020. Discovery and Genomic Characterization of a 382-Nucleotide Deletion in ORF7b and ORF8 during the Early Evolution of SARS-CoV-2. *MBio* 11. doi: 10.1128/mBio.01610-20
- Tanaka T, Kamitani W, DeDiego ML, Enjuanes L, Matsuura Y 2012. Severe acute respiratory syndrome coronavirus nsp1 facilitates efficient propagation in cells through a specific translational shutoff of host mRNA. *J Virol* 86: 11128-11137. doi: 10.1128/JVI.01700-12
- Thiel V, et al. 2003. Mechanisms and enzymes involved in SARS coronavirus genome expression. *J Gen Virol* 84: 2305-2315. doi: 10.1099/vir.0.19424-0
- Tran NV, Greshake Tzovaras B, Ebersberger I 2018. PhyloProfile: dynamic visualization and exploration of multi-layered phylogenetic profiles. *Bioinformatics* 34: 3041-3043. doi: 10.1093/bioinformatics/bty225

- Turonova B, et al. 2020. In situ structural analysis of SARS-CoV-2 spike reveals flexibility mediated by three hinges. *Science* 370: 203-208. doi: 10.1126/science.abd5223
- Ujike M, Taguchi F 2015. Incorporation of spike and membrane glycoproteins into coronavirus virions. *Viruses* 7: 1700-1725. doi: 10.3390/v7041700
- Vita R, et al. 2019. The Immune Epitope Database (IEDB): 2018 update. *Nucleic Acids Res* 47: D339-D343. doi: 10.1093/nar/gky1006
- Walls AC, et al. 2020. Structure, Function, and Antigenicity of the SARS-CoV-2 Spike Glycoprotein. *Cell* 181: 281-292 e286. doi: 10.1016/j.cell.2020.02.058
- Walls AC, et al. 2016. Glycan shield and epitope masking of a coronavirus spike protein observed by cryo-electron microscopy. *Nat Struct Mol Biol* 23: 899-905. doi: 10.1038/nsmb.3293
- Walls AC, et al. 2017. Tectonic conformational changes of a coronavirus spike glycoprotein promote membrane fusion. *Proc Natl Acad Sci U S A* 114: 11157-11162. doi: 10.1073/pnas.1708727114
- Wang P, et al. 2008. A systematic assessment of MHC class II peptide binding predictions and evaluation of a consensus approach. *PLoS Comput Biol* 4: e1000048. doi: 10.1371/journal.pcbi.1000048
- Watanabe Y, et al. 2020. Vulnerabilities in coronavirus glycan shields despite extensive glycosylation. *Nat Commun* 11: 2688. doi: 10.1038/s41467-020-16567-0
- Weiskopf D, et al. 2013. Comprehensive analysis of dengue virus-specific responses supports an HLA-linked protective role for CD8+ T cells. *Proc Natl Acad Sci U S A* 110: E2046-2053. doi: 10.1073/pnas.1305227110
- Weiss SR, Navas-Martin S 2005. Coronavirus pathogenesis and the emerging pathogen severe acute respiratory syndrome coronavirus. *Microbiol Mol Biol Rev* 69: 635-664. doi: 10.1128/MMBR.69.4.635-664.2005
- Wintjens R, Bifani AM, Bifani P 2020. Impact of glycan cloud on the B-cell epitope prediction of SARS-CoV-2 Spike protein. *NPJ Vaccines* 5: 81. doi: 10.1038/s41541-020-00237-9
- Wolff G, et al. 2020. A molecular pore spans the double membrane of the coronavirus replication organelle. *Science* 369: 1395-1398. doi: 10.1126/science.abd3629
- Wong HH, et al. 2018. Accessory proteins 8b and 8ab of severe acute respiratory syndrome coronavirus suppress the interferon signaling pathway by mediating ubiquitin-dependent rapid degradation of interferon regulatory factor 3. *Virology* 515: 165-175. doi: 10.1016/j.virol.2017.12.028
- Woo PC, Huang Y, Lau SK, Yuen KY 2010. Coronavirus genomics and bioinformatics analysis. *Viruses* 2: 1804-1820. doi: 10.3390/v2081803
- Wootton JC, Federhen S 1993. Statistics of local complexity in amino acid sequences and sequence databases. *Computers & Chemistry* 17: 149-163. doi: [https://doi.org/10.1016/0097-8485\(93\)85006-X](https://doi.org/10.1016/0097-8485(93)85006-X)
- Wrapp D, et al. 2020. Cryo-EM structure of the 2019-nCoV spike in the prefusion conformation. *Science* 367: 1260-1263. doi: 10.1126/science.abb2507
- Wrobel AG, et al. 2020. SARS-CoV-2 and bat RaTG13 spike glycoprotein structures inform on virus evolution and furin-cleavage effects. *Nat Struct Mol Biol* 27: 763-767. doi: 10.1038/s41594-020-0468-7

- Wu D, et al. 2005. Civets are equally susceptible to experimental infection by two different severe acute respiratory syndrome coronavirus isolates. *J Virol* 79: 2620-2625. doi: 10.1128/JVI.79.4.2620-2625.2005
- Xiao K, et al. 2020. Isolation of SARS-CoV-2-related coronavirus from Malayan pangolins. *Nature* 583: 286-289. doi: 10.1038/s41586-020-2313-x
- Yang TJ, et al. 2020. Cryo-EM analysis of a feline coronavirus spike protein reveals a unique structure and camouflaging glycans. *Proc Natl Acad Sci U S A* 117: 1438-1446. doi: 10.1073/pnas.1908898117
- Yurkovetskiy L, et al. 2020. Structural and Functional Analysis of the D614G SARS-CoV-2 Spike Protein Variant. *Cell* 183: 739-751 e738. doi: 10.1016/j.cell.2020.09.032
- Zhang BZ, et al. 2020a. Mining of epitopes on spike protein of SARS-CoV-2 from COVID-19 patients. *Cell Res* 30: 702-704. doi: 10.1038/s41422-020-0366-x
- Zhang C, Rabiee M, Sayyari E, Mirarab S 2018. ASTRAL-III: polynomial time species tree reconstruction from partially resolved gene trees. *BMC Bioinformatics* 19: 153. doi: 10.1186/s12859-018-2129-y
- Zhang S, et al. 2020b. Bat and pangolin coronavirus spike glycoprotein structures provide insights into SARS-CoV-2 evolution. *bioRxiv*: 2020.2009.2021.307439. doi: 10.1101/2020.09.21.307439
- Zhou H, et al. 2020a. A Novel Bat Coronavirus Closely Related to SARS-CoV-2 Contains Natural Insertions at the S1/S2 Cleavage Site of the Spike Protein. *Curr Biol* 30: 2196-2203 e2193. doi: 10.1016/j.cub.2020.05.023
- Zhou P, et al. 2020b. A pneumonia outbreak associated with a new coronavirus of probable bat origin. *Nature* 579: 270-273. doi: 10.1038/s41586-020-2012-7
- Ziebuhr J, Snijder EJ, Gorbalenya AE 2000. Virus-encoded proteinases and proteolytic processing in the Nidovirales. *J Gen Virol* 81: 853-879. doi: 10.1099/0022-1317-81-4-853
